# Supplementary material
Source: Springer Nature journal article supplement (https://www.springermedizin.de/resource/supplementary/12960_2007_112_MOESM12_ESM.pdf/9570436)
Supplement: MOESM12 [file 9570436]

*The government of the Philippines has encouraged temporary migration by its professionals in recent years. It has taken measures to turn remittances into an effective tool for national development (including health care) by encouraging migrants to send remittances via official channels. In 2004, the Central Bank of the Philippines reported total remittances of US\$ 8.5 billion, representing 10 percent of the country's gross domestic product. At the same time the government is taking measures to draw its migrants home after a period of service abroad. Many privileges are granted to returnees, including tax-free shopping for one year, loans for business capital at preferential rates and eligibility for subsidized scholarships. The Philippines experiment has had encouraging results and is seen by some developing countries as a role model [18].*
